# Supplementary material for: Two Novel Negative-Sense RNA Viruses Infecting Grapevine Are Members of a Newly Proposed Genus within the Family Phenuiviridae
Source: MDPI journal article supplement (doi:10.3390/v11080685), 2019-07-26
Supplement: s1 [file s1]

**Table S1.** PCR primers used for the detection of novel negative sense-RNA viruses in grapevine.

| Virus                       | Primer Name | Primer Sequence              | Region               | Expected Amplicon Size (bp) |
|-----------------------------|-------------|------------------------------|----------------------|-----------------------------|
| Grapevine Garan dnak virus  | GGDV-RDRP-F | 5' GCATGATTGCCCTGACTAATGG 3' | RdRp                 | 429                         |
|                             | GGDV-RDRP-R | 5' GCAGCTGTTTGGGAATTCA 3'    |                      |                             |
|                             | GGDV-NP-F   | 5' CTGATGACTTGCCTGCAGC 3'    | Nucleocapsid protein | 500                         |
|                             | GGDV-NP-R   | 5' TCCTTGGGCCATAAGGTTGC 3'   |                      |                             |
| Grapevine Muscat rose virus | GMRV-RDRP-F | 5' TGACGAGGTA ACTAAGTCTGC 3' | RdRp                 | 564                         |
|                             | GMRV-RDRP-R | 5' GTAGTTAAAGATCCCTCTCCAG 3' |                      |                             |
|                             | GMRV-NP-F   | 5' GAGGCAATATAAGGGCTGA 3'    | Nucleocapsid protein | 571                         |
|                             | GMRV-NP-R   | 5' GGCTTTACTTCCTCTTCCTT 3'   |                      |                             |
