# Supplementary material for: Two Novel Negative-Sense RNA Viruses Infecting Grapevine Are Members of a Newly Proposed Genus within the Family Phenuiviridae
Source: MDPI journal article supplement (doi:10.3390/v11080685), 2019-07-26
Supplement: s1 [file s1]

|               |   |                                                                          |    |
|---------------|---|--------------------------------------------------------------------------|----|
| GGDV          | 1 | MAD-----GNFA--LTGL-----                                                  | 11 |
| GMRV          | 1 | MAN-----GDFL--LAEF-----                                                  | 11 |
| ARWV1         | 1 | MAT-----GDFT--ISSF-----                                                  | 11 |
| ARWV2         | 1 | MAN-----GDFV--LSGL-----                                                  | 11 |
| UUKV          | 1 | MAM-----                                                                 | 3  |
| SFNV          | 1 | MSDE-----                                                                | 4  |
| TOSV          | 1 | MSDE-----                                                                | 4  |
| RVFV          | 1 | MD-----                                                                  | 2  |
| SFTSV         | 1 | MS-----                                                                  | 2  |
| CiVA          | 1 | MALHQNPK-----QSKFDALFSQATSHGEEHYREFLTKCSKNLKERIKREVNARK--MTSGGDFLESFEQAE | 66 |
| CCGaV         | 1 | MADKINNPS--TQAEFEAIYHDATSQDQAYFVAYFKRCRKALQERLKKKESARK--LIGAG-----       | 57 |
| WCLaV_1       | 1 | MD---HTN---AELIALINEKSSLGQAEFNKWFESLSKNNKSYVQKEMKARK--LAKAMTPSA-VEATE    | 60 |
| WCLaV_2       | 1 | MSSSRNTNNTLREQMKALKNKPE-----EQSAWLEGLNEQEMRFVETQMKTTKGIKLAQTTAASSSETSE   | 66 |
| UHBV          | 1 | MAM-----SVADVQTEIE-----                                                  | 13 |
| IWSV          | 1 | MSM-----SVAEQAEIE-----                                                   | 13 |
| RHBV          | 1 | MTM-----SVADVQTEIE-----                                                  | 13 |
| EBHV          | 1 | -----MSVADIQTEIE-----                                                    | 11 |
| RSV           | 1 | MG-----NKPAT--LADLQKAIN-----                                             | 17 |
| MSV           | 1 | MAT-----NKPAN--LNDLQKAIN-----                                            | 17 |
| RGSV          | 1 | MCK-----VQFGDGHW--ANNK-----                                              | 15 |
| LLV           | 1 | MT-----                                                                  | 2  |
| Consensus ss: |   | hh                                                                       |    |

|               |    |                                                                    |     |
|---------------|----|--------------------------------------------------------------------|-----|
| GGDV          | 12 | -----TTALTTLNHLTVSATNFK--AAARANT-----                              | 37  |
| GMRV          | 12 | -----TTVTITLLSHLLDVSAANYR--SAAKKNA-----                            | 37  |
| ARWV1         | 12 | -----STVVTLLNHLTVSAANFK--AAAKQNA-----                              | 37  |
| ARWV2         | 12 | -----TTALTTLNHLTVSAENFK--SAARSNA-----                              | 37  |
| UUKV          | 4  | -----PENNWRFAI--EISDAQWEE--EIREFI-----                             | 28  |
| SFNV          | 5  | -----NYRDIAL--AFLDESADS--GTINAWV-----                              | 27  |
| TOSV          | 5  | -----NYRDIAL--AFLDESADS--GTINAWV-----                              | 27  |
| RVFV          | 3  | -----NYQELAI--QFAAQAVDR--NEIQOWV-----                              | 25  |
| SFTSV         | 3  | -----EWSRIAV--EFGEQQLNL--TELEDA-----                               | 25  |
| CiVA          | 67 | DKSGKLDNKEGELEEDHEDEEDEVTEGSGTKKDIVVTDQAL--AAMWTEIDN--IDVSTPDRE--S | 127 |
| CCGaV         | 58 | PKFATRDG--DDGQEPENKGDGA-----DSSNISDIQL--AEMWQEI DL--MDVTSIDSE--S   | 107 |
| WCLaV_1       | 61 | ETSSS-----SRPPTQSI PKP-----VLTDEVSDSL--ISMWSEIDSMDVSSIDRESL--      | 107 |
| WCLaV_2       | 67 | DPKG-----PAVESLP-----TEITEARI--AAMWTEIDN--FDVSSLDQE--S             | 104 |
| UHBV          | 14 | -----RVTALAL--KYITDHKD--TLVTFV-----                                | 34  |
| IWSV          | 14 | -----RVSTLAL--KYITEHKD--ILVAF-----                                 | 34  |
| RHBV          | 14 | -----RVSTLAL--KYITDHKD--TLVTFV-----                                | 34  |
| EBHV          | 12 | -----RVTALAL--KYIADHKD--TLVTFV-----                                | 32  |
| RSV           | 18 | -----DISKDAL--SYLTAHKA--DUVTFA-----                                | 38  |
| MSV           | 18 | -----DISKDAL--KYLTDNKA--SVTTFH-----                                | 38  |
| RGSV          | 16 | -----EWSDLLS--EIFSKIR--ASIDGFANATADL--                             | 42  |
| LLV           | 3  | -----SALSV--YTMISAADT--TGVEEFS-----                                | 23  |
| Consensus ss: |    | hhhhhhh hhhhhhhh hhhhhh                                            |     |

|               |     |                                                                        |     |
|---------------|-----|------------------------------------------------------------------------|-----|
| GGDV          | 38  | -KYFAYDGFNANEILTSFIAIFL-TNSNDDDALQDLCDIVNIGLTRGNI----REDQLKKTs--KRGRE  | 98  |
| GMRV          | 38  | -KEFAYDGFNANEILNSFLKSFK-ANEDDEEALQDLCDIVNIGLTRGNI----RADQLSKTs--KKGRE  | 98  |
| ARWV1         | 38  | -KYFAYDGFNAIEILTAFLIIFK-SNTDDADALQDLCDIVNIGLTRGNI----REDQLQKTs--KKGKE  | 98  |
| ARWV2         | 38  | -KYFAYDGFNASEIILTAFTIFS-GNTDSDDALQDLCDIVNIGLTRGNI----HENQLKKTs--KRGRE  | 98  |
| UUKV          | 29  | -NLFQYQGFDAAVVLSRI FELAKKADLSRDQMLRDIALITLHLTRGNK----LSSIEKRLs--EEGKK  | 90  |
| SFNV          | 28  | -NEFAYQGFDPKRIVQLVKERGT--AKGRDWKKDVKMMIVLNLVRGNK----PEAMMKKMs--EKGAS   | 86  |
| TOSV          | 28  | -NEFAYQGFDPKRIVQLVKERGT--AKGRDWKKDVKMMIVLNLVRGNK----PEAMMKKMs--EKGAS   | 86  |
| RVFV          | 26  | -REFAYQGFDAARRVIELLKQYG-----GADWEKDAKKMIVLALTRGNK----PRRMMKMs--KEGKA   | 81  |
| SFTSV         | 26  | -RELAYEGLDPALIIKKLKET-----GGDDWVKDTKFII VFALTRGNK----IVKASGKMs--NSGSK  | 81  |
| CiVA          | 128 | TKVFDYQGFNPDEVLRSLIINQRKNKVSAA DFKS DILLMCSLAIIKGS I--NEHNFFKLS--TEGQS | 190 |
| CCGaV         | 108 | LKVFHDQGFKNPNEILKSLMVQARKNKVSKEDPFTDILMCAISI IKGSI--NEHNFFKLS--TEGQT   | 170 |
| WCLaV_1       | 108 | -RIFEQYQGFNPDEILKSLIIAQQRKNKISGDQFKTDILTCAISI IKGSI--NDHNFGKIS--KEGQD  | 169 |
| WCLaV_2       | 105 | LKIFEQYQGFNPKAILISLMKSCDKNKIPKEQFKSDIITLCAISI IKGSI--NSNNIKKVs--EEGQQ  | 167 |
| UHBV          | 35  | -GQIEYNGYDAGKLLQILKKA-----EGRDFGKDL CYLLVMRYTRGTG--FVRDVRKKIKTAAGD     | 93  |
| IWSV          | 35  | -GQIDYNGYDAGKLLKILQDKS-----KNRDFGKDLCHLLVMRYTRGTG--FVRDVRKKIKVAAGGE    | 93  |
| RHBV          | 35  | -GQIEYNGYDAGKLLQILKKA-----EGRDFGKDL CYLLVMRYTRGTG--FVRDVRKKIKTAAGD     | 93  |
| EBHV          | 33  | -GQIEYNGYDAGKLLQILKKA-----EGRDFGKDLGFLLVRYTRGTG--FVRDVRKKIKTAAGD       | 91  |
| RSV           | 39  | -GQIEYAGYDAATLIGILKDKG-----GDTLAKDMTCITMRYVRGTG--FVRDVTKKVKVAGST       | 96  |
| MSV           | 39  | -DQIGYAGYDAATLIGILKDKG-----GATLAQDVVKMIVMRYVRGTG--FVKDVTKKKTATAGSE     | 96  |
| RGSV          | 43  | AAGLEYQAFNPEKILRKLIASS----TSLDDFVKDMRDLLVARYTRGTSFLFNAKNSIEKAKD--KKKAE | 106 |
| LLV           | 24  | -TLFAYEGFNPEMIHSHPAKIMTEKGIGEMEFVNDMRALITLGAMKGNY----TMKNAGKIS--EAGRT  | 85  |
| Consensus ss: |     | hhhhh hhhhhhhhhh hhhhhhhhhhhhhh hhhhhh hhhh                            |     |

GGDV 99 RIEELSKKYNIKIKKT---KNE NSTLSNSTLTFTRSISVFP-YVASQLLATGACILEPNNCKFG-TDDL 163  
GMRV 99 RIEELSKKYNIKIKKS---KSEK MVLNSTLTFTRSISVFP-YVASQLLATRSCEVEPNCKPFG-TDDL 163  
ARWV1 99 RIEELAKKYNIMKKT---KKDKIALTNSMTTFTRSISVFP-YVASQLLSQSCILEPTGCKFG-SDDL 163  
ARWV2 99 RIEELSKKYNIKIRKT---KNEKLVLSNSTLTFTRSISVFP-YVASQLLSTGSCVLEQNNCEFG-SDEL 163  
UUKV 91 EFALLKARYQLVDKAK---EADLTLSRIAIAAGLTCTRIILPQVVAHTAVTRSR---MES---LSADYP 150  
SFNV 87 IVANLISVYQLKEGNP---GRDTITLSRVSAAFVPTVQALRVLSSELPVSGTT---MDA---IAGVTYP 147  
TOSV 87 IVANLISVYQLKEGNP---GRDTITLSRVSAAFVPTVQALRVLSSELPVSGTT---MDA---IAGVTYP 147  
RVFV 82 TVEALINKYKLKEGNP---SRDELTLRVAAALAGWTCQALVVLSEWLPVTGTT---MDG---LSPAYP 141  
SFTSV 82 RLMAHQEKYGLVERAE---TRLSTFVRVAQSLPTWTCAAALKEYLFPVGPV---MNL---KVENYP 141  
CiVA 191 TVIRLEKTYGIKRGSGRSEPANVVTISRIGATFPFKIIQLLV---ENKASSRKF---MGP---LKSHTLP 251  
CCGaV 171 EVQRLEKTYGIKRGSGRNEPANVVTISRIGATFPFKIIQLFL---AGKVTARKF---IGP---FKSHTLP 231  
WCLaV\_1 170 AIVKLENSYGIKRGSGRGMNSTVTVSRIAATFPFGIVQLLR---DNKVSARKF---IGP---LKSHTLP 230  
WCLaV\_2 168 EISRLETLNRIKGGGRKERPDVTIVSRIGATFPFKIVQLIH---AGKVQSRKF---MGP---FSSSLP 228  
UHBV 94 TAHEIVTHYGVVHSGV---DNADAITLGRLASLFPVSMNIVRVNSTGAKLA---VDSDDLGSGLD 154  
IWSV 94 TSHEIVTHYGVVQSVG---DNADAITLGRLASLFPVSMNIVRVNSTGAKLA---VDSADMGTSGID 154  
RHBV 94 TAHEIVTHYGVVQSVG---DNADAITLGRLASLFPVSMNIVRVNSTGAKLA---VDSDDLGSGLD 154  
EBHV 92 TAHEIVTHYGVVQSVG---DNADAITLGRLASLFPVSMNIVRVNSTGAKLA---VDSDDLGSGLD 152  
RSV 97 EASTLVSRYGIVSSVG---TNANAITLGRLAQLFPNVSEHVVRQIS-GVKMA---VDSDDLGLTGCD 156  
MSV 97 EAAALVARYGLVSSVG---SNANAITLGRVAQLFPNVSEFVTQFT-GLKMA---IDSSDLMSGT 156  
RGSV 107 AIQVLINRYGVKNAG-DNAVDAQTLGRISQVLATMALRVALQITDYHKPIPL---RPF---DIDK 168  
LLV 86 KADGLYKKNMKGSL-GGDKKAVILPRVLSAFPFLTKVY---LRTPPRDFGTR-----TTRL 141  
Consensus ss: hhhhhhhhh hhhhhhhhhhhhhhhhhhhhhhh

GGDV 164 AAFK---HSGFSSLIPIAD---NNYCLVLFQCHVAYMISFGKKINPE-----NKDDDLTWYKKQT 218  
GMRV 164 VAFK---HSGFSSLIPTG-----NNYCLVLFQCHIAIYMSFGKKINPE-----NKDDITVWYNKQK 216  
ARWV1 164 AAFK---HSGFASLIPIG-----NDYCSILFQCYLAYMISFGKINPE-----NKEEDKVVYAKQR 216  
ARWV2 164 SAFK---HSGFASLIPTG-----NNYCTVLFQCHIAIYMSFGKKIDPA-----NKDDVITWYNKQK 216  
UUKV 151 VCMM---HNFAAGLIDETLP---EDSIKALVDAHRLYLLEFSRTINVKHRG---MEAKEILDAND--- 206  
SFNV 148 RAMM---HPSFAGIIDLDP---NGAGATADAHGLFMIEFSKTINPSLRT---KQANEVAATFE--- 203  
TOSV 148 RAMM---HPSFAGIIDLDP---NGAGATADAHGLFMIEFSKTINPSLRT---KQANEVAATFE--- 203  
RVFV 142 RHMM---HPSFAGMVDPSLP---GDYLRALDAHSLYLLQFSRVINPNLRG---RTKEEVAATFT 197  
SFTSV 142 PEMM---CMAFGSLIPTAGVS---EATTKTLMEAYSLWQDAFTKTINVKMRG---ASKTEVYNSFR 198  
CiVA 252 QFIR---HQGFAAVPTTLA---ESTRMFLLDITVAYSVQDSISIPNKK---NKPLDASLYEKQR 308  
CCGaV 232 QYVR---HQAFSAVIPPSSLN---ERTKMYLLDITAFSVQDSICISPNKK---EKPLSNLFEKQR 288  
WCLaV\_1 231 AVMR---HQAFAAVPTALR---EKTRNFLILITAFSVQDSINISPNKK---EKPDVEGLFKLQE 287  
WCLaV\_2 229 PVMR---HQAFAAVPRSMN---HKIKEFLQLITAFSVQDSINISPNKK---EKMDPVTTFTSTQH 285  
UHBV 155 LLLWDFVFPQFITLDSVTAPYCSGKGMNIIILFSHLVHGALTTRKTMPPQKKKARNLVTDFELVKYTT 221  
IWSV 155 ILLWDFVFPQFISLDSVTAPYCNKKNANNVLLSLQLQGALTTRKTMPPQKKKARNLITDYDFVKYTS 221  
RHBV 155 LLLWDFVFPQFITLDSVTAPYCTGKGMNTILFSHLVHGALTTRKTMPPQKKKARSIVTDFELVKYTT 221  
EBHV 153 ILLWDFVFPQFITLDSVTAPYCTGKGMNVILFSHLVHGALTTRKTMPLDKKKARSIVTDFELVKYTT 219  
RSV 157 NLLWDYVPQYIKLSEETAPYCSHLSHLIFVHVIIHSFQITKTMPEGGKKERGLTKDIDMMKYTT 223  
MSV 157 SLLWDFVFPYITLDSSTAPYCTTGSVAHILFSHVIHAFVLVTKTMPEAKKKERGLLKIDIDIKYTT 223  
RGSV 169 NAIIDVVPQFYLKADQLDSK---TNSEAALYVIHLCYQCVCSERIMTKAQKDKHSVHTKSAMTHCM 233  
LLV 142 KYIK---NPFVPSLVPKTLQ---GDVAKTFLWLITYVSAEQSLVIS-----QEKDFNAFTAQK 194  
Consensus ss: hhhh hh hhhhhhhhhhhhhhhhhhhhh hhh hhhhhhhhh

GGDV 219 QYSMAAWNNSLYNNDFRIT-----AFGNLG-----LDSh----- 248  
GMRV 217 QFSFAAWNNTLYNNEYRKK-----AFKNLG-----LDSh----- 246  
ARWV1 217 QYSYAAWSNLGLCTSDYRRS-----AFRNLG-----LDSh----- 246  
ARWV2 217 QYSIAAWNMSLYDNDYRKT-----AFKNLG-----LDSh----- 246  
UUKV 207 SALQAGLA-SSFLTSPQKRA-----YLLSEK-----LVDS----- 235  
SFNV 204 KPNMAAMS-GRFFTREDKKK-----LLIavg-----IIDE----- 232  
TOSV 204 KPNMAAMS-GRFFTREDKKK-----LLIavg-----IIDE----- 232  
RVFV 198 QPMNAAVN-SNFISHEKRRE-----FLKAFG-----LVDS----- 226  
SFTSV 199 DPLHAAVN-SVFFPNVVRVK-----WLKAGG-----ILGP----- 227  
CiVA 309 SFI-QTTA-DNKYPSEIVRK-----KIFTTI-----MIDY----- 336  
CCGaV 289 AFV-QTTS-DAEYPPEIVRK-----KIFSTI-----LLDY----- 316  
WCLaV\_1 288 NFIIQVSAD-NIYPPEISIRVK-----IFKSV-----ILNY----- 315  
WCLaV\_2 286 NYIQVIHD-GEYPPENIKKQ-----IFKTI-----INF----- 314  
UHBV 222 ELLVITCN-AKNLKAEEKTSYRESLMRPFQEGAGDALGFKETFWTSLA-----KVS----- 272  
IWSV 222 ELMVITCS-AKNLTDEKKQTYRRKLVSFAQTDD---SGYKQEFWDALG-----QVS----- 269  
RHBV 222 ELLVITCN-AKNLKEKRTIYRESLMRPFQEGAGDALGFKETFWTSLA-----KVST----- 272  
EBHV 220 ELLVITCN-AKNLKAERKTAIRKSLMSFQEGAGDALGFKESFWTSLA-----KVS----- 270  
RSV 224 GLLVITCK-SKNLSDKKKEGRKKVLDEFITNG---KVKTTIFDALA-----GMST----- 270  
MSV 224 GLLVITCQ-SKNLNEAKKSGRKTVCPEYCVNE---KFKEFLALLA-----SFGK----- 270  
RGSV 234 GFVNILAMD-NSSVVSDDKIA-----GRRMISGP-----WGLQETALDATC 273  
LLV 195 QFVTIAFN-SSVPDETTRIG-----MFKAKLEDLVQAISDFKDFD----- 234

| Consensus_ss: | hhhhhhh | hhhhhh                                                       | hhhhhh    |     |
|---------------|---------|--------------------------------------------------------------|-----------|-----|
| GGDV          | 249     | -----GKYG-----ELYFKI-----VNNLRKSIKEGEVKPADLEFFIKEDKNL        |           | 286 |
| GMRV          | 247     | -----EKYG-----ALYLKI-----VNNIRKAIKEEEVKPEDLAPYVKEGKIE        |           | 284 |
| ARWV1         | 247     | -----TNYG-----AIYLVK-----ANNLRKSLGDPVETIAYLETfvKSGQIE        |           | 284 |
| ARWV2         | 247     | -----EKYG-----IVYMKV-----VNKLRAINEEEVQLSDLAAPfKdGSIE         |           | 284 |
| UUKV          | 236     | -----NGKV-----NKAVQQ-----AATVLRSLI-----                      |           | 254 |
| SFNV          | 233     | -----DLVL-----ASAVVR-----SAEKYRAKV-----GK-----               |           | 253 |
| TOSV          | 233     | -----DLVL-----ASAVVR-----SAEKYRAKV-----GK-----               |           | 253 |
| RVFV          | 227     | -----NGKP-----SAAVMA-----AAQAYKTAA-----                      |           | 245 |
| SFTSV         | 228     | -----DGVP-----SRAAEV-----AAAYRNRL-----                       |           | 245 |
| CiVA          | 337     | -----DSLl-----TARALLKVIpDFtIVTKENfVSDI-----NSTHI-----        |           | 370 |
| CCGaV         | 317     | -----DQLL-----STARAILKVFPEFVIvSKENfNADI-----NATHI-----       |           | 350 |
| WCLaV_1       | 316     | -----DDLl-----TCARSISKfINDIIIPtRDEFMSDI-----SQL-----         |           | 347 |
| WCLaV_2       | 315     | -----DLLV-----TAR-KIvALTGNLEIPSKDEFNSAV-----MSFN-----        |           | 346 |
| UHBV          | 273     | -----GCVrKMKKDAQTYLSERTSLLKVFVDNCNKAEAEVTEAI-----KAYfVTES--  |           | 319 |
| IWSV          | 270     | -----GCVrKLKKDAQNYLKDRtTVLKVMVENCTKTEAEAIeAI-----KAFFAPEDV-- |           | 317 |
| RHBV          | 273     | -----GCVrKMKKDAQYLSERTPLlLKVFVENCNKSEDEVAEAI-----KSYfVTGA--  |           | 319 |
| EHbV          | 271     | -----GCVKMKKDAQAYLSERTSLLKLfVENCNKTEAEVTEAI-----KSYfVTDA--   |           | 317 |
| RSV           | 271     | -----NTlSTYGNQTRLYLAQQSKLMKILAEtNSKTATEVSGLV-----KEffFEDEAEg |           | 319 |
| MSV           | 271     | -----NVVCSYGTQVKQFLAEQCslMKTIvDNSSKTQDEMKALI-----IEffFEeEe   |           | 316 |
| RGSV          | 274     | ACIIDVVDFCCRGHKV-----TDAVAP-----VRLfRLAI-----ECI-KDTADL      |           | 312 |
| LLV           | 235     | -----GEVP-----TNRS-----DARVARDAI-----TTL-----                |           | 254 |
| Consensus_ss: |         | hhhhhh                                                       | hhhhhhhhh | h   |
| GGDV          | 287     | KW-----                                                      |           | 288 |
| GMRV          |         | -----                                                        |           |     |
| ARWV1         | 285     | AKGSIS-----                                                  |           | 290 |
| ARWV2         | 285     | QV-----                                                      |           | 286 |
| UUKV          |         | -----                                                        |           |     |
| SFNV          |         | -----                                                        |           |     |
| TOSV          |         | -----                                                        |           |     |
| RVFV          |         | -----                                                        |           |     |
| SFTSV         |         | -----                                                        |           |     |
| CiVA          |         | -----                                                        |           |     |
| CCGaV         |         | -----                                                        |           |     |
| WCLaV_1       |         | -----                                                        |           |     |
| WCLaV_2       |         | -----                                                        |           |     |
| UHBV          |         | -----                                                        |           |     |
| IWSV          |         | -----                                                        |           |     |
| RHBV          |         | -----                                                        |           |     |
| EHbV          |         | -----                                                        |           |     |
| RSV           | 320     | ADD-----                                                     |           | 322 |
| MSV           |         | -----                                                        |           |     |
| RGSV          | 313     | KDAGVKLKLTVDK                                                |           | 325 |
| LLV           |         | -----                                                        |           |     |
| Consensus_ss: |         |                                                              |           |     |

**Figure S3.** Multiple sequence alignment of nucleocapsid proteins (NPs) encoded by grapevine Muscat rose virus (GMRV), grapevine Garan dmac virus (GGDV) and NPs encoded by viruses representative of several genera. The virus name and distance in amino acids from the N-terminus of the protein are shown on the left-hand side of each sequence. Consensus secondary structure (ss) elements, predicted by PROMALS3D, are reported at the bottom, with the helices indicated by “h”. Amino acids that fold in strands and helices are in blue and red, respectively. Green asterisk (\*) indicates a tyrosine involved in RNA binding in RVFV and UUKM (Mottram et al., 2017; Raymond et al., 2012), while blue asterisk marks three positive charged amino acids predicted to be involved in the protein RNA binding activity in RVFV and RSV (Ferron et al., 2011; Lu et al., 2017). The grey asterisk denotes the phenylalanine residue shown to have an essential role for infectivity in RVFV (Mottram et al., 2017).
