# Supplementary material for: Two Novel Negative-Sense RNA Viruses Infecting Grapevine Are Members of a Newly Proposed Genus within the Family Phenuiviridae
Source: MDPI journal article supplement (doi:10.3390/v11080685), 2019-07-26
Supplement: s1 [file s1]

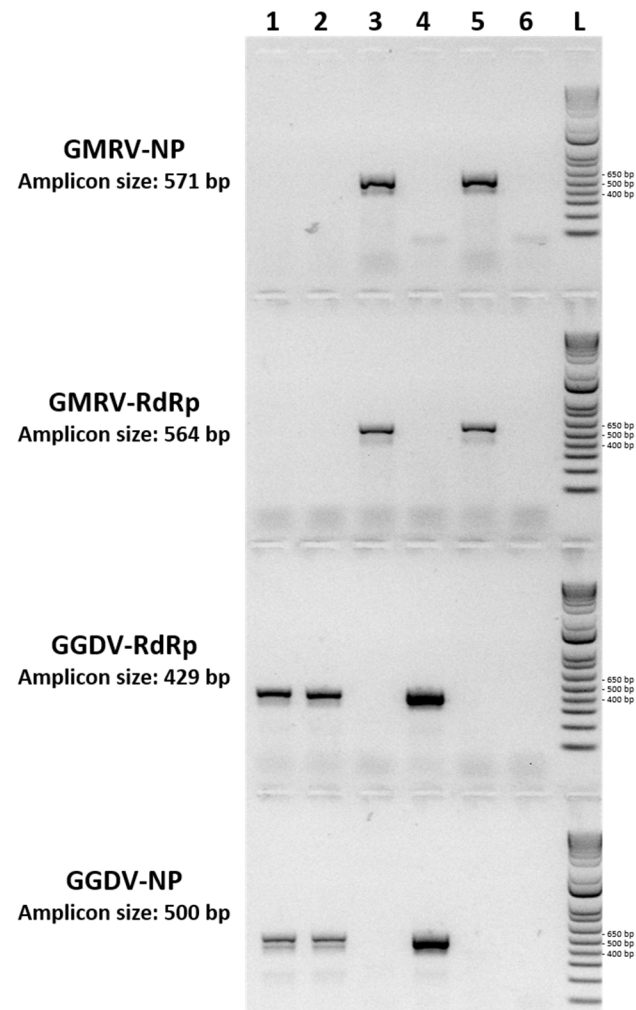

**Figure S4.** Detection of grapevine Muscat rose virus (GMRV) and grapevine Garan dmak virus (GGDV) in grapevine plants by reverse transcription PCR (RT-PCR). Lane 1, Alloued zeine; lane 2, Dizmar; lane 3, Chenin blanc; lane 4, Garan dmak; lane 5, Muscat rose; lane 6, negative control (water); lane L, 1 Kb Plus DNA Ladder. Detection by different RT-PCR assays (listed on the left side) targeting the RNA-dependent RNA polymerase (RdRp) and nucleocapsid protein (NP) of GMRV and GGDV.
