# Supplementary material for: Two Novel Negative-Sense RNA Viruses Infecting Grapevine Are Members of a Newly Proposed Genus within the Family Phenuiviridae
Source: MDPI journal article supplement (doi:10.3390/v11080685), 2019-07-26
Supplement: s1 [file s1]

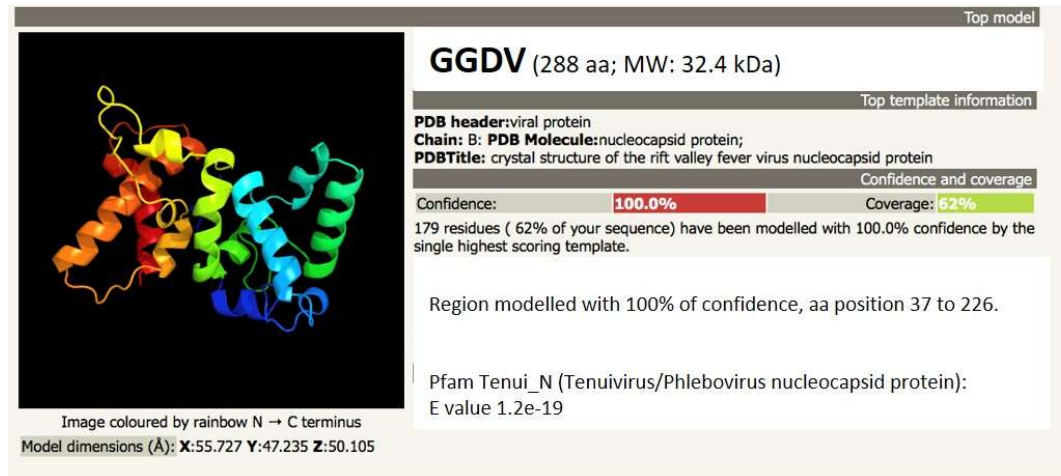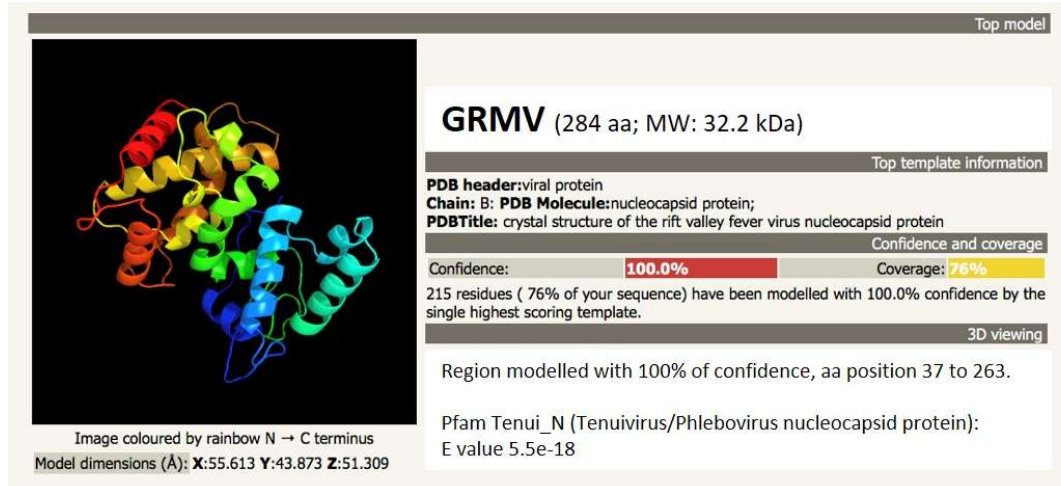

**Figure S2.** Modeling and prediction of nucleocapsid proteins (NPs) encoded by grapevine Garan dmak virus (GGDV) and grapevine Muscat rose virus (GMRV). Analysis performed with Phyre2 web portal.
