# Supplementary material for: Two Novel Negative-Sense RNA Viruses Infecting Grapevine Are Members of a Newly Proposed Genus within the Family Phenuiviridae
Source: MDPI journal article supplement (doi:10.3390/v11080685), 2019-07-26
Supplement: s1 [file s1]

**Table S3.** Nucleotide sequences identities between grapevine Muscat rose virus, grapevine Garan dmak virus and apple rubbery wood virus 2.

| Pairwise identity (%)       | Apple rubbery wood virus 2* |            |            |
|-----------------------------|-----------------------------|------------|------------|
|                             | RNA 1 (RdRp)                | RNA 2 (MP) | RNA 3 (NP) |
| Grapevine Muscat rose virus | 60.85                       | 77.06      | 73.38      |
| Grapevine Garan dmak virus  | 56.28                       | 62.25      | 58.62      |

RdRp, RNA-dependent RNA polymerase; MP, movement protein; NP, nucleocapsid protein.

\*GenBank accessions of apple rubbery wood virus 2: RNA 1, MF062128; RNA 2, MF062145; RNA 3, MF062140.
