# Supplementary material for: Two Novel Negative-Sense RNA Viruses Infecting Grapevine Are Members of a Newly Proposed Genus within the Family Phenuiviridae
Source: MDPI journal article supplement (doi:10.3390/v11080685), 2019-07-26
Supplement: s1 [file s1]

| ID     | GenBank      | Genus           | aa position                                                              |
|--------|--------------|-----------------|--------------------------------------------------------------------------|
| GMRV   |              |                 | 113 -----YRPI-----DVNERL--KMS-----AKYRTVHLDGIMVNCESLMPK----              |
| GGDV   |              |                 | 115 -----VYHPI-----DSNERI-----RMR-----KHYRTVHLDGIEVNCESLMPK----          |
| CaLCuV | NP_624353    | Begomovirus     | 38 ----LTELILQ-----FPSTAAQF--TARL-----NRSCKMKIDHCVIEYRQQVPI----          |
| CiLV-C | YP_654542    | Cilevirus       | 47 ---RIGVGFLT-----PNDMISRL--VGFI--NRKAEDAGVRSVESFRQISDVVLIIVPQIA-----   |
| AcVB   | YP_004935360 | Vitivirus       | 78 ---VDQNIIDL-----DEKTTIDGL-----NEE-----KQPYLHLGCVIAIVIPHGR-----        |
| LNyV   | YP_425089    | Cytorhabdovirus | 53 ---IMRQVPLF-----DKEDLDAM--KS-----DTT-----SNKYLHIGCITVTSIEPLLHQRYMKN   |
| AMV    | NP_041194    | Alfamovirus     | 60 ---APVVLSLV-----SKEKKSIL--NRML--PKIG-----QRMVYVHSAIYLLYPNLIK----      |
| CMV    | NP_040776    | Cucumovirus     | 52 ---AISVRLPV-----PEVTHGRI--ASFF--KSGYDVGE-LCSKGYMSVPQVLCVTRTVST-----   |
| CaMV   | NP_056724    | Caulimovirus    | 97 ---GKVVPLLI-----TKEEINKR--LSSL--KPEVR-----KTMSMVHLGAVKILLKAQFRN----   |
| ToTV   | YP_001040018 | Torradovirus    | 66 ----KKAMELF-----DPEDVHNI--TSLWSSFKKFTSSR-DHGNLFFHLYGVMMFVMPVHVG----   |
| TBSV   | NP_062900    | Tombusvirus     | 32 ---EDQEVPLL-----PSNFLTQV--RVG-----LSGGYITMRRIRIKIIPLVSR-----          |
| RBDV   | NP_620466    | Idaeovirus      | 138 ---GKNEFSLV-----EASVFDKL--IR-----KDDSPHILNRLLIIVLPAVGK----           |
| PYFV   | NP_734443    | Sequivirus      | 115 ---RAEITPT-----AASKLDKT--LE-----AHRA-----KFNYMAIDSIRVAVTSIMHQ----    |
| CLBV   | NP_624334    | Cittrivirus     | 55 ---IKLQANIL-----TADRLQSI--RN-----AKVNGK-----EAYLHLGLFVPIAIRSLPSS----  |
| CCGaV  | YP_009407930 | Coguvirus       | 122 DDTEQFNLSLA-----VPKKG-----KQYVRLSSVMAYYCPVLVSS-----                  |
| TMV    | NP_597748    | Tobamovirus     | 36 -CSKVYDKIMVHENESLSVENLLKGV--KL-----IDSGYC--LAGLVVTGEWNLPD----         |
| RRV    | YP_004327592 | Emaravirus      | 63 ---KTQLLPI-----VYNEMYKF--YM-----HLK-----QPMTRIASVALFWTPTSK----        |
| PYMoV  | YP_008567619 | Badnavirus      | 100 ---NQVDRTFI-----QEESHKKF-----VKS-----GIKFIHLGVLQVRLQILHRK----        |
| SDV    | NP_733976    | Sadwavirus      | 53 ---QQQDIAIP-----LSSRF-----NHQSLHVGELIAVQSSVLT-----                    |
| ACLSV  | NP_040552    | Tricovirus      | 62 ---RLASIPVI-----PSSEVQAV-----LRKRE-----STNYVHWGALSISIDALFRK----       |
| RSV    | NP_620519    | Tenuivirus      | 88 ----ATFNIL-----DPYWFHQPLTHYPF-FRVTHYP-----FFRVETFAMVWIGIKG-----       |
| GFLV   | NP_733995    | Nepovirus A     | 118 -NTLEILYNPV-----SEEMEEY--RDR-----GMSAVVIDALEIATNPFMGMP----           |
| CRLV   | YP_081449    | Cheravirus      | 109 -DPYVAVYTPLP--HITTEEQARKL--MEK-----GFSNSSNVALDMAVQSHVQG----          |
| CPMV   | NP_734000    | Comovirus       | 204 ---TVLDIPVT-----DKKTLAMA--SD-----FIRKENL--KTSAIHIGATEIIIQSFASP----   |
| CPsV   | YP_089663    | Ophiovirus      | 84 ---HKKKLKLG-----TLKSIDTK--LR-----KLGGES-----SQPPIQYKVKQCMYIPLFSRV---- |
| PolV   | YP_009032637 | Aureovirus      | 30 ---TKAILPLA-----PISQFSKW-----KIP-----KQGFYAPIDVKFVLTPHISE----         |
| OuMV   | YP_008567619 | Ourmiavirus     | 57 ---VEDPTALI-----PHGWSIF--KSKL--AQMRC-----PKGYITHDKVLISWKPHVAT----     |
| CNSV   | NP_733974    | Nepovirus B     | 432 ---VNLNRP-----EYNALNKL--A-----EAGWK-----BAKSVVNLNHIRSYLPQ----        |
| CMoV   | YP_002302261 | Umbravirus      | 42 ---TLTHPTLY-----PRRQLTL--SRFF--SGRWRTK--KTGGMLFIEKLVIVFVPHVPD----     |
| SBWMV  | NP_049337    | Furovirus       | 44 ---RYVEKALT-----QPGVVTKM--QDAW--TNWTKTNKEEGTPYNMSSCVLLVINPTVPM----    |
| RCNMV  | NP_620546    | Dianthovirus    | 33 ---GVSEAPLI-----PASMMSKI--TDYA--KTAK--GNSVALNTHVVLSLAPTIGV----        |
| TSWV   | AEK06236     | Orthotospovirus | 111 ---ANKVIKIC-----PTWD-----SRKQYMMISIRIIVWCPTIPN-----                  |

Consensus ss:  
ee eeeeeee

|        |              |                 |                                                                       |
|--------|--------------|-----------------|-----------------------------------------------------------------------|
| GMRV   |              |                 | -GSEGFAMITLYDERFISQ-----EKGFLG--LIGFPLSHGV-----SKASLKIN-----          |
| GGDV   |              |                 | -GSEGFALLTLVDERFVSQ-----EKGFLG--LIGFPLSHGV-----SKASLVVN-----          |
| CaLCuV | NP_624353    | Begomovirus     | -NATGSVIVEIHDKRMTD-----DESLOA--SWTFPLRCNI-----DLHYFSSS-----           |
| CiLV-C | YP_654542    | Cilevirus       | --LPAELSLKLVDSANI-----LEAVNQ--EVTVNSTGGP-----CVVVMNCA-----            |
| AcVB   | YP_004935360 | Vitivirus       | -AMKGTQVQIKVEDQRFKE-----GHGTVC--SFKCDLKDAL-----SAYASFPG-----          |
| LNyV   | YP_425089    | Cytorhabdovirus | FGKTTIAGNCAIISTFRKV-----DQSIIS--LHKYDLSRGR-----ADVSVYPN-----          |
| AMV    | NP_041194    | Alfamovirus     | -SSSGSITLKLNEATGEL-----VDV--DTDHDATQA-----CIFAGRYP-----               |
| CMV    | NP_040776    | Cucumovirus     | -DAEGSLRIYLADLGDKEL-----SPIDGQ--CVSLNHNDLP-----ALVSVQPT-----          |
| CaMV   | NP_056724    | Caulimovirus    | -GIDTPIKIALIDDRINSR-----RDCLLG--AAKGNLAYGK-----FMETVYPK-----          |
| ToTV   | YP_001040018 | Torradovirus    | --GEGSVKISLCSSNDP-----TNPVQLQ--EKVLYFSGGA-----QAVLMSPT-----           |
| TBSV   | NP_062900    | Tombusvirus     | -KAGVSGKLYLRDISDIT--GRKLHC--TESLDLGREI-----RLTMQHLD-----              |
| RBDV   | NP_620466    | Idaeovirus      | -GTPGTARIKILDARLDDG-----YGEFLS--SENVRVDSG-----VIYICINVG-----          |
| PYFV   | NP_734443    | Sequivirus      | -GDSRECIIMYLCRRRFKDP-----LLGAIA--LIGFTLPGMQTHVYKTRGMMAFSRK-----       |
| CLBV   | NP_624334    | Cittrivirus     | GNEQIWGRCALVDSRTTRA-----ETAVID--EFEFKFTKKQPF--ASKLLTINAAVD-----I      |
| CCGaV  | YP_009407930 | Coguvirus       | FSEFTKVSISLHDSRLLS-----KTCVQ--SADFNSNIT-----QMVYIIPD-----             |
| TMV    | NP_597748    | Tobamovirus     | -NCRGGSVSVCLVDKRMERA-----DEATLG--SYTTAAAKKR-----FQFKVVPN-----         |
| RRV    | YP_004327592 | Emaravirus      | -RFNEMATLILMDERFRDDGI--KQGGKELLA--QKGLNLDLMG-----TVITAVFPDPNFQQFVTGSL |
| PYMoV  | YP_008567619 | Badnavirus      | -EEGTALVLVLDNRWKG-----DKGIIA--TMEVDLTGKC-----QMVYIIPD-----            |
| SDV    | NP_733976    | Sadwavirus      | -GVDTAMAIMVSDASHDRL-----EEGFLS--LTILRLGAGW-----MRHTIPIG-----          |
| ACLSV  | NP_040552    | Tricovirus      | -NAGVSGWCYVYDNRWTF-----EQAMLQ--KFHFNLDLGS-----ATLVTSFN-----           |
| RSV    | NP_620519    | Tenuivirus      | -RASGITTLRIIDKSYVNP-----SDQVEV--EVRYPIKSNF-----AVLGSAN-----           |
| GFLV   | NP_733995    | Nepovirus A     | -GNPTDLTVVATYGERHDM-----TRAFIG--SASTFLGNGL-----ARAIFFPG-----          |
| CRLV   | YP_081449    | Cheravirus      | -GTPLLAMCGIMDSRTDDP-----NEALQV--AGYFDLGRDR-----CDLISLPL-----          |
| CPMV   | NP_734000    | Comovirus       | -ESDLMGSGFLVDSLHTD-----ANARS--IFVAPMRGGR-----PVRVVTFFN-----           |
| CPsV   | YP_089663    | Ophiovirus      | DGDNGEITVSLIDDGKEAA-----GQDPIIQ--SITFDASQM-----AMVELSMN-----          |
| PolV   | YP_009032637 | Aureovirus      | -RAQVRGVVVLVDSDRLSP-----SRLEYR--SKEFNIGHGL-----VIEGSQLP-----          |
| OuMV   | YP_002019758 | Ourmiavirus     | --GLARGQIAVLVDTRVNHTSIEDLHMALWK--TAPVDLGCTY-----TIQGTVP-----          |
| CNSV   | NP_733974    | Nepovirus B     | -QMNAAYAFQVIMWGHSSDA-----QEAALS--GSYVYLGdge-----ATMLQLPL-----         |
| CMoV   | YP_002302261 | Umbravirus      | -TSPGQAVIWWHTALPGL-----EPIGTGQKVCIPLSSGP-----RLVAFYPN-----            |
| SBWMV  | NP_049337    | Furovirus       | -GYAGTVEVSLIDSGLSPL-----ENVIPDQTQMMELGKGP-----NVMCFMFM-----           |
| RCNMV  | NP_620546    | Dianthovirus    | -AIPGHVTVELINPNVEGP-----FQVMSGQTLSWSPGAGK-----PCLMIFSVH-----          |
| TSWV   | AEK06236     | Orthotospovirus | --PTGKLVVALVDPNMPSE-----KVIL--KGQGTITDP-----ICFVIFYLN-----            |

Consensus ss:  
eeeeee eee eeeee eeeee

|        |              |                 |                                                                  |
|--------|--------------|-----------------|------------------------------------------------------------------|
| GMRV   |              |                 | -YSISTADN-----VNWVAIITVYDHCLRD--DMRPCNFHLKAFYKYTNNVRRFIKDEEKSEIG |
| GGDV   |              |                 | -YSISTFDE-----VNWVAITVYDHNLRD--DMRPCNFHLKAFYKYTNNVSRFLKNIDETEVG  |
| CaLCuV | NP_624353    | Begomovirus     | -FFSLKDPi-----PWKLYYRVSDTNVHQ--RTHFAKFKGLK-----                  |
| CiLV-C | YP_654542    | Cilevirus       | -HSIPNEDRTHVNG--SEVHRRLLGIQYQVDCDNISG--RVTTFSITALW-----          |
| AcVB   | YP_004935360 | Vitivirus       | -YFVSTTVKVN-----GYALNLKVKAEGMCMVE--GVHPLSIQMH-----               |
| LNyV   | YP_425089    | Cytorhabdovirus | -HCLSLTDPMI-----QKRLSVLLGIKIDVEP--GVELFSICIGY-----               |
| AMV    | NP_041194    | Alfamovirus     | -RSILAKDAK-----GHDLKLVVHAVASTNA--NSAVGVLYPIW-----                |
| CMV    | NP_040776    | Cucumovirus     | -YDCPMETVGN-----RKRCFAVVIERRHGYIQY--TGTTASVCSNW-----             |
| CaMV   | NP_056724    | Caulimovirus    | -FGISLNTQRL-----NQTLSLIHDFENKNLNMKGDKVMTITYVV-----               |
| ToTV   | YP_001040018 | Torradovirus    | -ITLPFVKRG-----PMFYTMECLGTRA--QIPCSVVAIW-----                    |
| TBSV   | NP_062900    | Tombusvirus     | -FSVSTRSD-----VPYVFGFEELVSPLE--GRELFISISRW-----                  |
| RBDV   | NP_620466    | Idaeovirus      | -YSVPKSEI-----DYKINIDFAGVPIKD--GKSPIWVKAFF-----                  |

|               |              |                 |                                                        |
|---------------|--------------|-----------------|--------------------------------------------------------|
| PYFV          | NP_734443    | Sequivirus      | -EAIAAD-----RLQLYLYVKGAKLERTQNTPTITVNVRT-----          |
| CLBV          | NP_624334    | Citriovirus     | NCKVSVG-----SIQVLELHGVDLRE-ERSVAAIL-----               |
| CCGaV         | YP_009407930 | Coguvirus       | -YCIPTSC-----SKITLNIAREQKFLQE-GEEWATVQLLRL-----        |
| TMV           | NP_597748    | Tobamovirus     | -YAITQDAMK-----NVWQVLVNIRNVKMSA-GFCPLSLEFVSVCIY-----   |
| RRV           | YP_004327592 | Emaravirus      | DFATDTKDI-----NKIKFYISFPDTRM-----                      |
| PYMoV         | YP_008567619 | Badnavirus      | -IMMTVNDFY-----HNHISVLTRGYEGWQHGEANLLVTRGM-----        |
| SDV           | NP_733976    | Sadwavirus      | -ITVFPTDPLV-----DRFLRLSVLTGGSPMAD-GRQVARLHYGL-----     |
| ACLSV         | NP_040552    | Tricovirus      | -FPVSLDDPGL-----SNSISVAVMFENLNFKF-ESYPISVRVGN-----     |
| RSV           | NP_620519    | Tenuivirus      | --FLALEDK-----HNLQVSVSVDDSSVQN---CVISRTLWFW-----       |
| GFLV          | NP_733995    | Nepovirus A     | -LQYSQEEPRR-----ESIIRLYVASTNATVDT-DSVLAATISVGT-----    |
| CRLV          | YP_081449    | Cheravirus      | -INFPLNKEDFD-----DYMRLGLYCTMFHNVRGFQNNKALCSYSA-----    |
| CPMV          | NP_734000    | Comovirus       | -TLAPVSCDL-----NNRFLKICSLPNCDIVQ-GSQVAEVSNNV-----      |
| CPsV          | YP_089663    | Ophiovirus      | -FVVEKKDM-----DFIGIHVSAENVPVQ--DRAYGSINLAFF-----       |
| PoLV          | YP_009032637 | Aureovirus      | -FCLPVGD-----YPLQFEVTVLQSQFRE-TANLYSTSVIEW-----        |
| OuMV          | YP_002019758 | Ourmiavirus     | -YCLPFHPKEGGDVKSDLESQNPIRGIVYITDSRY-----               |
| CNSV          | NP_733974    | Nepovirus B     | -LCEYVGHNLDQF---EAYKRSLVLSTVFPEFSGIADGKAMFGITSIEF----- |
| CMoV          | YP_002302261 | Umbravirus      | -YSIPLSDSAMN-----APRCFSLVTQLEGVRLEQ-GASAFSLYSMW-----   |
| SBWMV         | NP_049337    | Furovirus       | -YSIPLNDKGR-----AVKLAFKIDAEM--ASK-GMSVMNVSYW-----      |
| RCNMV         | NP_620546    | Dianthovirus    | -HQLN--SDH-----EPFRVRI TNTG--IPT-KKS YARCHAYW-----     |
| TSWV          | AEK06236     | Orthotospovirus | -WSIPKMNTTP-----ENCCQLHLMCSQ-EYKK-GVSVFGSVMSW-----     |
| Consensus ss: |              |                 | eee eeeeeee eeeeeee                                    |

**Figure S1.** Multiple sequence alignment of movement proteins (MPs) encoded by grapevine Muscat rose virus (GMRV), grapevine Garan dmak virus (GGDV) and 30K MPs encoded by viruses representative of several genera. The virus name, GenBank identifier, virus genus and distance in amino acids (aa) from the N-terminus of the protein are shown on the left-hand side of each sequence. Consensus secondary structure (ss) elements, predicted by PROMALS3D, are reported at the bottom, with the strands and helices indicated by “e” and “h”, respectively. Amino acids that fold in strands and helices and are in blue and red, respectively.
