# Supplementary material for: Two Novel Negative-Sense RNA Viruses Infecting Grapevine Are Members of a Newly Proposed Genus within the Family Phenuiviridae
Source: MDPI journal article supplement (doi:10.3390/v11080685), 2019-07-26
Supplement: s1 [file s1]

**Table S2.** High throughput sequencing (HTS) data generated from the Muscat rose and Garan dmak grapevines.

| Sample      | Pass Filter Reads | Yield          | Average Read Length (nt) |
|-------------|-------------------|----------------|--------------------------|
| Garan dmak  | 26,726,694        | 2,004,502,050  | 75                       |
| Muscat rose | 172,311,649       | 13,095,685,324 | 75                       |
